# Supplementary material
Source: PubMed Central journal article supplement (PMC6174354)
Supplement: mmc1.pdf [file mmc1.pdf]

**The American Journal of Human Genetics, Volume 103**

**Supplemental Data**

**ClinPred: Prediction Tool to Identify**

**Disease-Relevant Nonsynonymous**

**Single-Nucleotide Variants**

**Najmeh Alirezaie, Kristin D. Kernohan, Taila Hartley, Jacek Majewski, and Toby Dylan Hocking**

## Supplemental figures

Figure S1

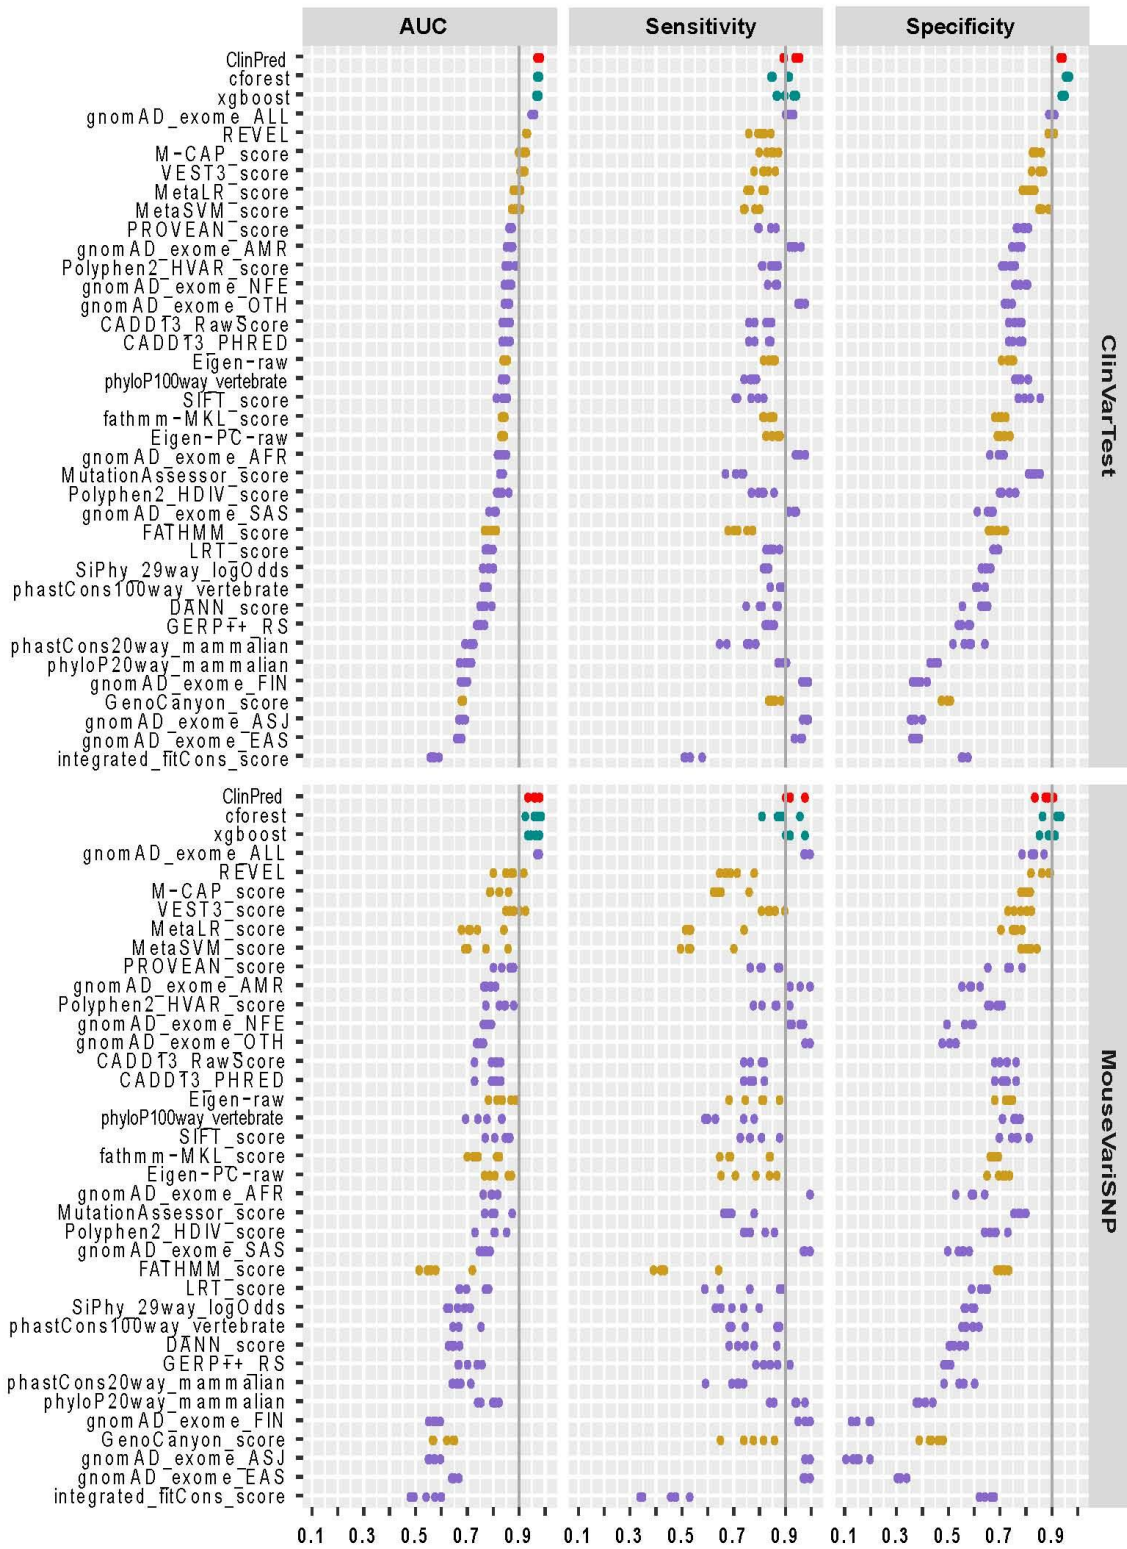

Figure S1: The performance of our models was compared against their constituting features and other available tools in ClinVarTest and MouseVariSNP. Analysis is based on the raw scores and was calculated for 5-fold cross validation.

Figure S2

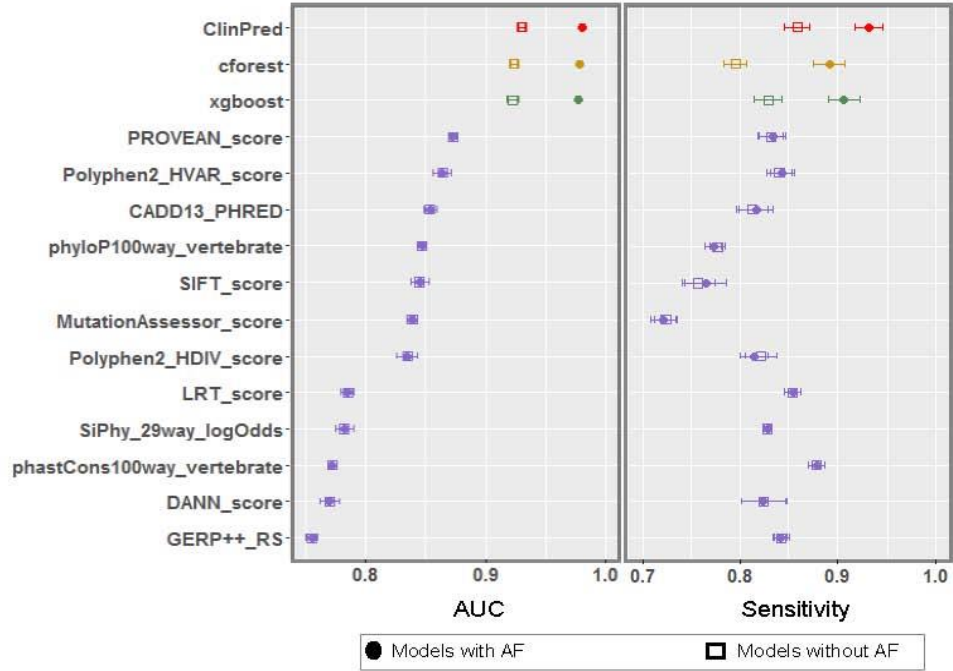

Figure S2: AF boost sensitivity and AUC score when applied as a feature in our models. We show mean AUC, mean sensitivity and error bars for 5-fold cross validation.

Figure S3

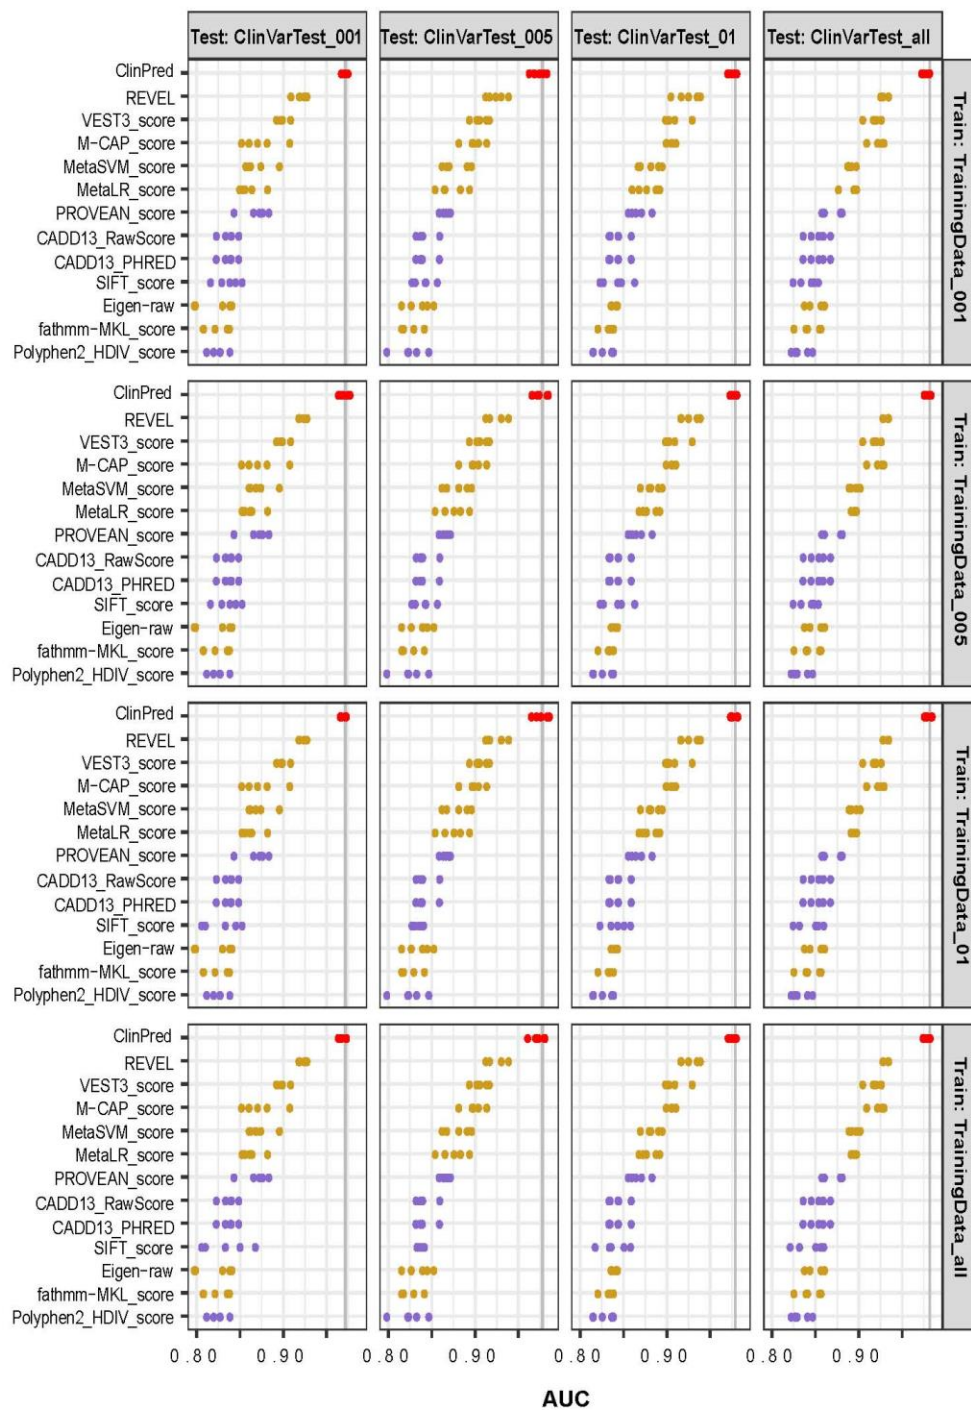

Figure S3: The performance of ClinPred was compared to recently developed and commonly used tools. We trained on our training data and tested our models on ClinVarTest using various AF cutoffs: whole data set regardless of AF, AF less than 0.01, less than 0.005 and less than 0.001. In all conditions, ClinPred was superior to other tools, achieving highest AUC score. Analysis is based on the raw scores and was calculated for 5-fold cross validation.

Figure S4

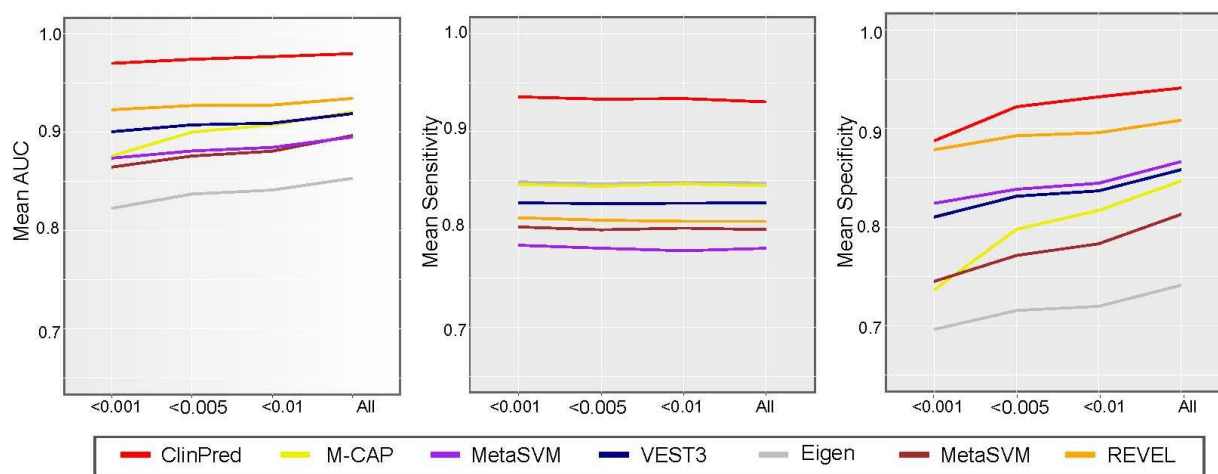

Figure S4: Performance of ClinPred was compared to recently developed ensemble tools. Models were trained on the training data and tested on ClinVarTest using various AF cutoffs: all data set regardless of AF, AF less than 0.01, less than 0.005 and less than 0.001. In all conditions, ClinPred was superior to other tools.

**Figure S5**

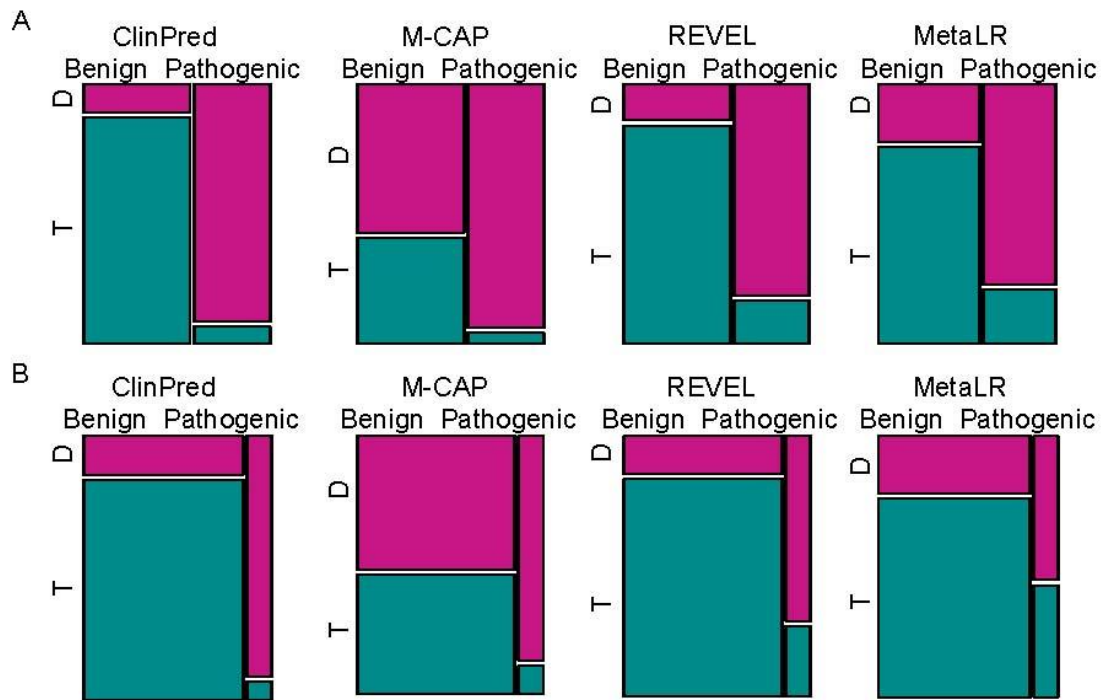

Figure S5: Comparison of ClinPred with categorical predictions available from M-CAP, REVEL, and MetaLR. REVEL and ClinPred scores lower than 0.5 are defined as tolerant and greater than 0.5 as damaging. We show proportions of benign and pathogenic variants that were classified as Tolerated (T, Green) and Damaging (D, Pink). ClinPred had the best performance in finding as many pathogenic variants possible while minimizing the number of benign variants that are predicted as damaging both in ClinVarTest with AF < 0.01 (A) and MouseVariSNP with AF < 0.01 (B).

Figure S6

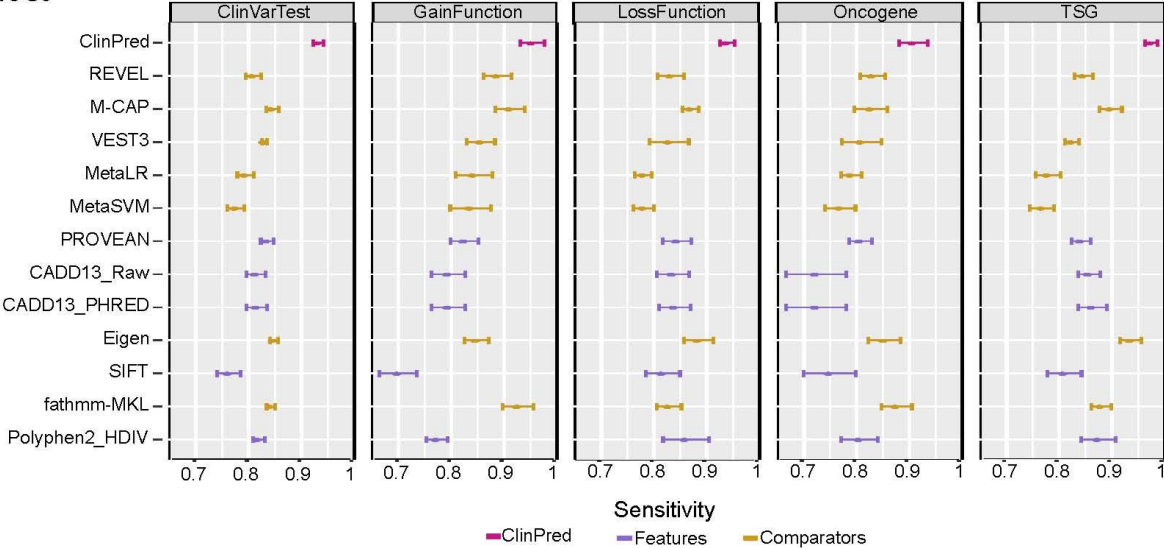

Figure S6: ClinPred performance remained robust across distinct datasets based on different genetic models and pathogenic mechanisms. We show mean sensitivity and error bars for 5-fold cross validation in all test datasets.



Figure S7

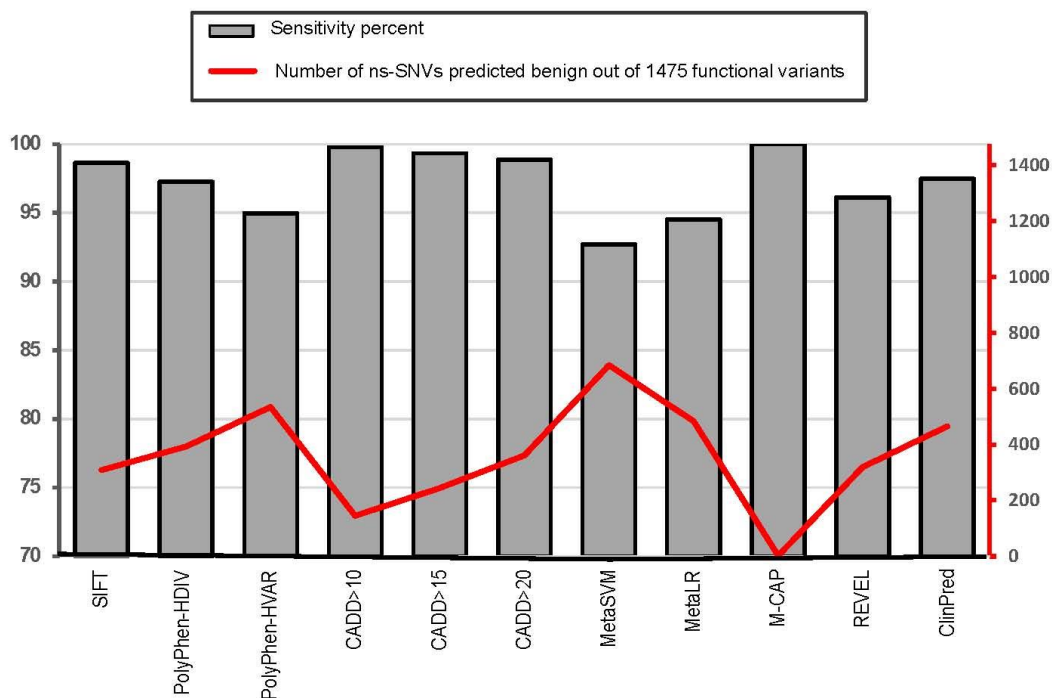

Figure S7: Illustration of performance of ClinPred as compared to other tools for functional assays scores of BRCA1 variants from Database of Functional Classifications of BRCA1. We show sensitivity of each tool to detect loss of function variants in comparison to number of nonsynonymous variants predicted as benign among 1464 functional variants in this database.

## Supplemental tables

Table S1: Description of datasets

| Data          |              | Total variants | Benign | Pathogenic |
|---------------|--------------|----------------|--------|------------|
| Training data |              | 11082          | 7059   | 4023       |
| Test data     | ClinVar Test | 5759           | 4169   | 1590       |
|               | MouseVariSNP | 1897           | 1680   | 217        |
|               | DoCM         | 1189           | 0      | 1189       |
|               | LossFunction | 1066           | 776    | 290        |
|               | GainFunction | 293            | 160    | 133        |
|               | Oncogene     | 354            | 242    | 112        |
|               | TSG          | 635            | 475    | 160        |

Table S2: Overview of performance of ClinPred in comparison to raw scores of other tools in ClinVarTest

| model            | sensitivity | specificity | FPR  | accuracy | precision | error.percent | F1 score | MCC  |
|------------------|-------------|-------------|------|----------|-----------|---------------|----------|------|
| ClinPred         | 0.94        | 0.94        | 0.06 | 0.94     | 0.86      | 6.04          | 0.90     | 0.85 |
| xgboost          | 0.91        | 0.95        | 0.05 | 0.94     | 0.87      | 6.42          | 0.89     | 0.84 |
| cforest          | 0.89        | 0.97        | 0.03 | 0.95     | 0.91      | 5.49          | 0.90     | 0.86 |
| VEST3_score      | 0.83        | 0.84        | 0.16 | 0.84     | 0.66      | 16.48         | 0.73     | 0.62 |
| MetaSVM_score    | 0.78        | 0.85        | 0.15 | 0.83     | 0.67      | 16.84         | 0.72     | 0.60 |
| MetaLR_score     | 0.80        | 0.80        | 0.20 | 0.80     | 0.60      | 20.18         | 0.69     | 0.55 |
| M-CAP_score      | 0.84        | 0.36        | 0.64 | 0.50     | 0.34      | 50.36         | 0.48     | 0.20 |
| fathmm-MKL_score | 0.84        | 0.69        | 0.31 | 0.73     | 0.51      | 26.53         | 0.64     | 0.48 |
| Eigen-raw        | 0.76        | 0.74        | 0.26 | 0.74     | 0.53      | 25.58         | 0.62     | 0.45 |
| REVEL            | 0.82        | 0.89        | 0.11 | 0.87     | 0.74      | 13.20         | 0.77     | 0.68 |

FPR: False positive rate

MCC: Matthews correlation coefficient

Table S3: Overview of performance of ClinPred in comparison to raw scores of other models in MouseVariSNP test

| model            | sensitivity | specificity | FPR  | accuracy | precision | error.percent | F1 score | MCC  |
|------------------|-------------|-------------|------|----------|-----------|---------------|----------|------|
| ClinPred         | 0.93        | 0.88        | 0.12 | 0.89     | 0.50      | 11.44         | 0.65     | 0.63 |
| xgboost          | 0.91        | 0.89        | 0.11 | 0.89     | 0.51      | 11.02         | 0.65     | 0.63 |
| cforest          | 0.88        | 0.92        | 0.08 | 0.92     | 0.60      | 8.07          | 0.72     | 0.69 |
| VEST3_score      | 0.86        | 0.78        | 0.22 | 0.79     | 0.34      | 20.98         | 0.48     | 0.45 |
| MetaSVM_score    | 0.58        | 0.81        | 0.19 | 0.79     | 0.29      | 21.24         | 0.38     | 0.30 |
| MetaLR_score     | 0.58        | 0.75        | 0.25 | 0.73     | 0.23      | 26.73         | 0.33     | 0.23 |
| M-CAP_score      | 0.66        | 0.61        | 0.39 | 0.62     | 0.18      | 37.95         | 0.29     | 0.18 |
| fathmm-MKL_score | 0.75        | 0.68        | 0.32 | 0.69     | 0.23      | 31.15         | 0.36     | 0.28 |
| Eigen-raw        | 0.76        | 0.73        | 0.27 | 0.73     | 0.27      | 26.67         | 0.40     | 0.34 |
| REVEL            | 0.71        | 0.87        | 0.13 | 0.86     | 0.42      | 14.50         | 0.53     | 0.47 |

FPR: False positive rate

MCC: Matthews correlation coefficient

Table S4: Overview of performance of ClinPred in comparison to categorical scores of other tools in MouseVariSNP test.

|            | Sensitivity % | Specificity % | FPR  | Accuracy | Precision | Error Percent | F1 Score | MCC  |
|------------|---------------|---------------|------|----------|-----------|---------------|----------|------|
| ClinPred   | 92.63         | 88.04         | 0.12 | 0.89     | 0.50      | 11.44         | 0.65     | 0.63 |
| xgboost    | 91.24         | 88.69         | 0.11 | 0.89     | 0.51      | 11.02         | 0.65     | 0.63 |
| cforest    | 88.48         | 92.38         | 0.08 | 0.92     | 0.60      | 8.07          | 0.72     | 0.69 |
| REVEL      | 71.43         | 86.65         | 0.13 | 0.85     | 0.41      | 15.09         | 0.52     | 0.46 |
| M-CAP      | 88.73         | 47.20         | 0.53 | 0.53     | 0.21      | 47.16         | 0.34     | 0.25 |
| MetaLR     | 56.28         | 79.25         | 0.21 | 0.77     | 0.26      | 23.36         | 0.35     | 0.26 |
| Fathmm_mkl | 91.16         | 38.92         | 0.61 | 0.45     | 0.16      | 55.15         | 0.27     | 0.20 |

FPR: False positive rate

MCC: Matthews correlation coefficient

Table S5: Overview of performance of ClinPred in comparison to categorical scores of other tools in DoCM test.

|            | NA/Pathogenic | TPR sensitivity | FNR  |
|------------|---------------|-----------------|------|
| cforest    | 0             | 0.89            | 0.10 |
| xgboost    | 0             | 0.91            | 0.08 |
| ClinPred   | 0             | 0.94            | 0.05 |
| REVEL      | 0             | 0.83            | 0.16 |
| M-CAP      | 12            | 0.95            | 0.04 |
| MetaLR     | 0             | 0.67            | 0.32 |
| Fathmm_mkl | 0             | 0.97            | 0.02 |

NA/pathogenic: Number of pathogenic variants with missing data

TPR: True positive rate

FNR: False negative rate
